# Supplementary material for: Midbody Proteins Display Distinct Dynamics during Cytokinesis
Source: Cells. 2022 Oct 22;11(21):3337. doi: 10.3390/cells11213337 (PMC9656288; doi:10.3390/cells11213337)
Supplement: Supplementary file 1 [file cells-11-03337-s001.zip]

Archive with 6 entries (6 files):
- Supplementary Information.pdf
- TableS1.xlsx
- VideoS1.mov
- VideoS2.mov
- VideoS3.mov
- VideoS4.mov
